# Supplementary material for: A link between H3K27me3 mark and exon length in the gene promoters of pluripotent and differentiated cells
Source: Oxford University Press journal article supplement (doi:10.1093/bioinformatics/btq047), 2010-02-09
Supplement: bioinformatics_26_7_855_s5.zip [file bioinformatics_26_7_855_s5.zip]

Archive with 1 entries (1 files):
- bioinf-2009-1487-File007.pdf
